# Supplementary figures and images for: Experimental evidence of soft mode in the smectic C*α phase of chiral ferroelectric liquid crystals
Source: Royal Society of Chemistry journal article supplement (doi:10.1039/c4sm01631a), 2014-01-01

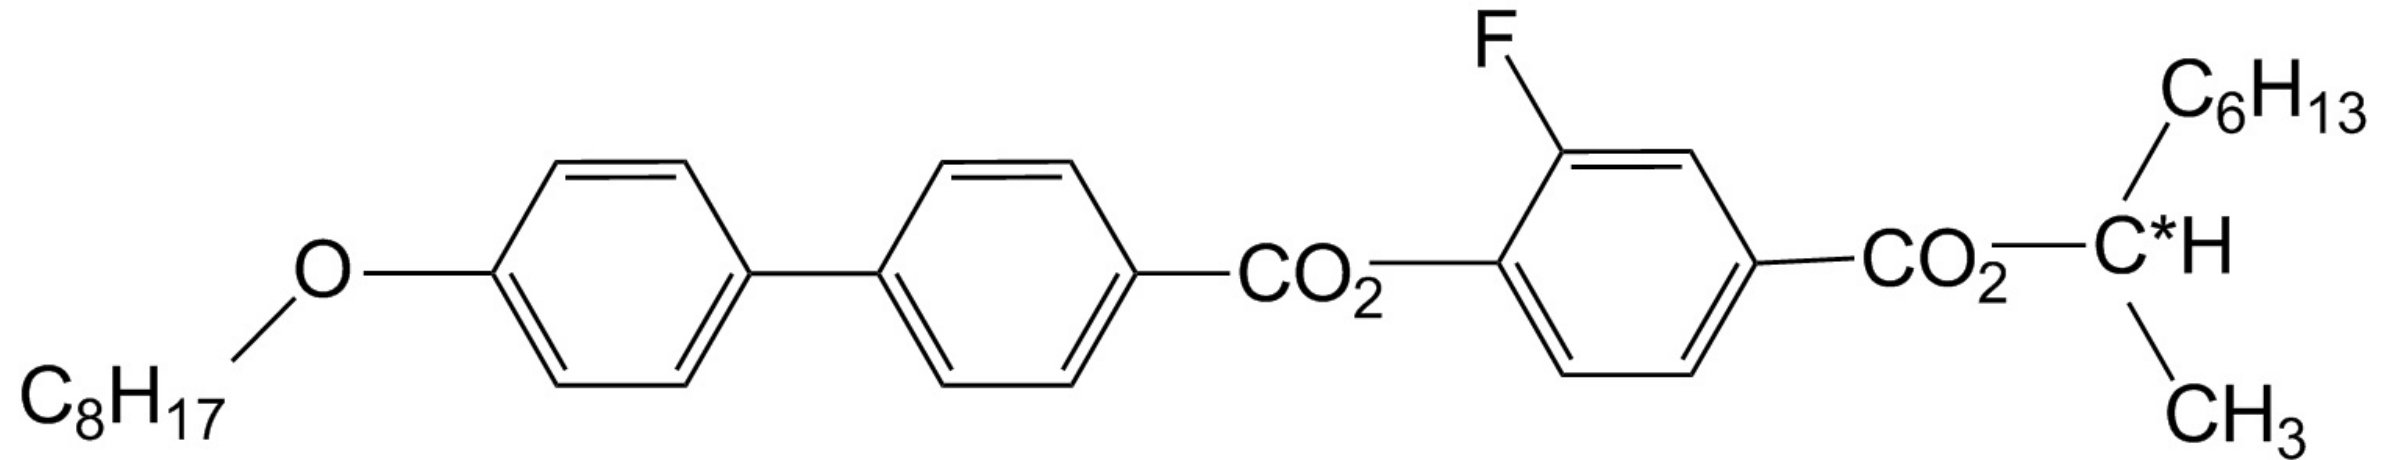

Supplement: c4sm01631a1.pdf [file c4sm01631a1.pdf]

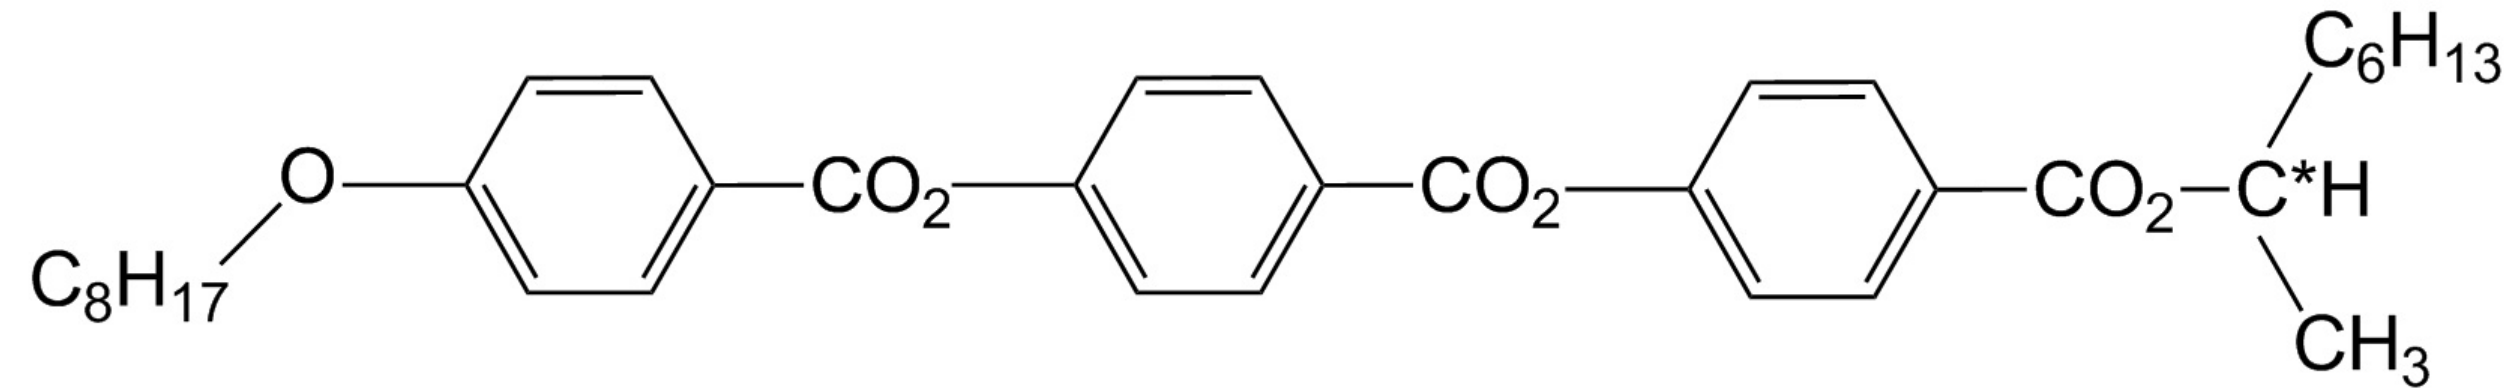

Supplement: c4sm01631a2.pdf [file c4sm01631a2.pdf]

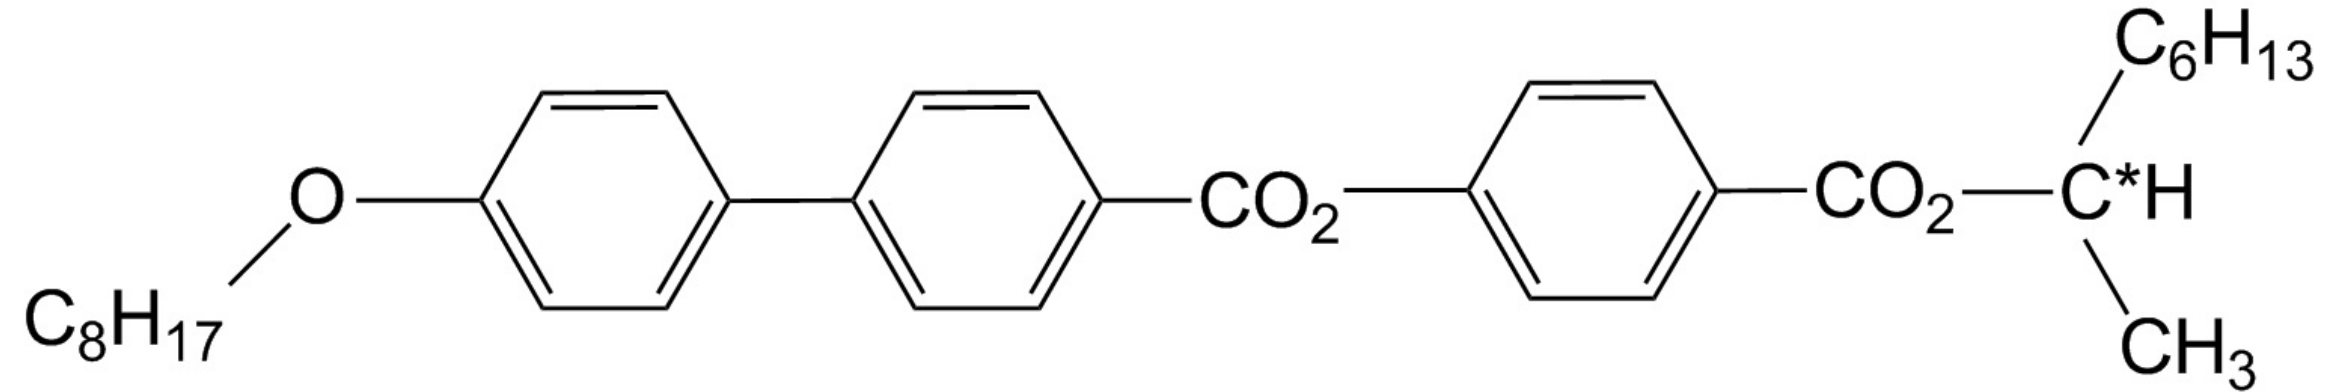

Supplement: c4sm01631a3.pdf [file c4sm01631a3.pdf]
